# Supplementary material
Source: PubMed Central journal article supplement (PMC9474432)

# Supplementary figure 1

## Baseline

## Prime

## Boost

BNT162b2  
formulation

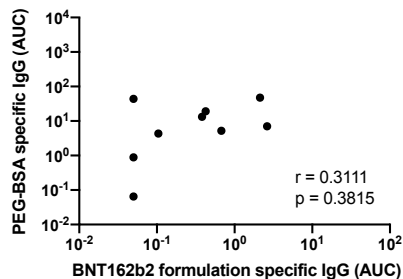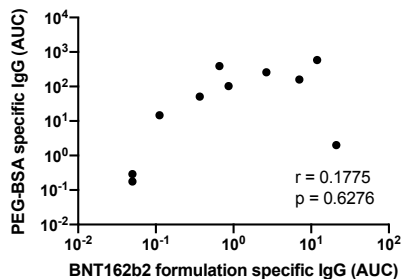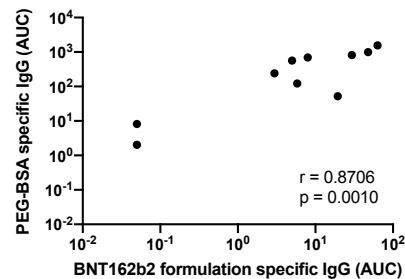

mRNA-1273  
formulation

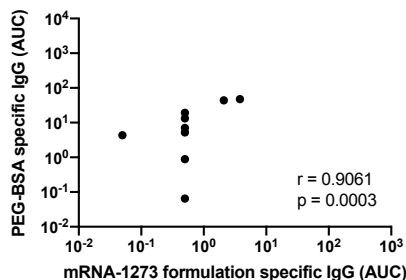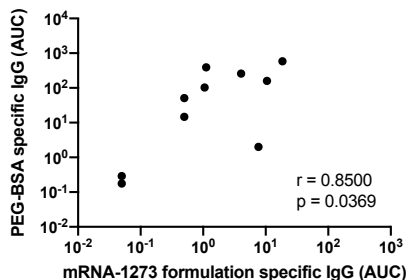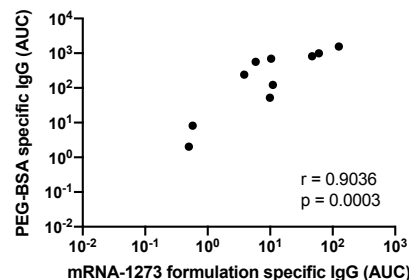

Non-specific  
LNPs

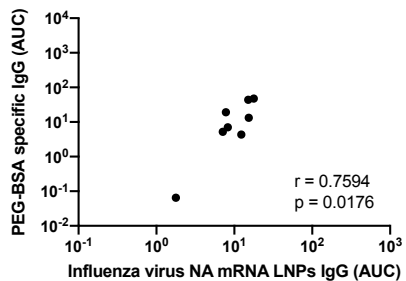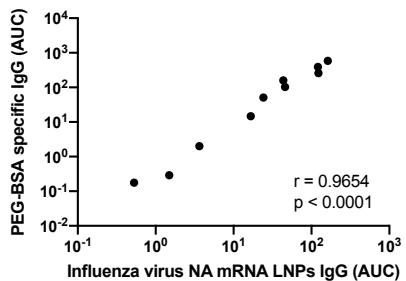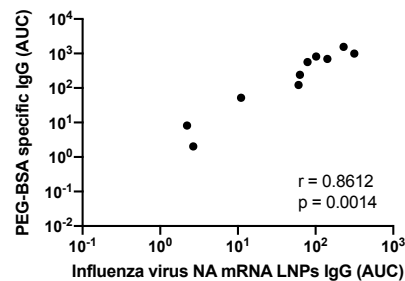

PEG

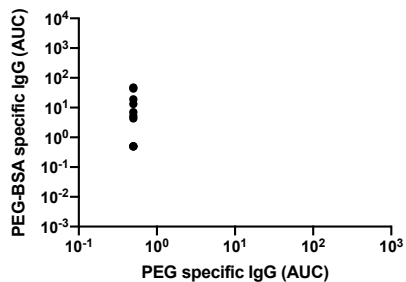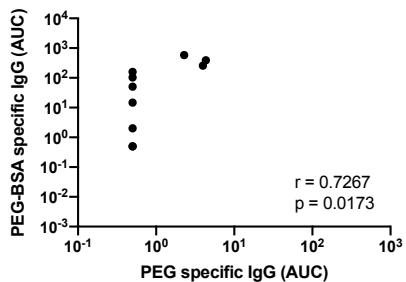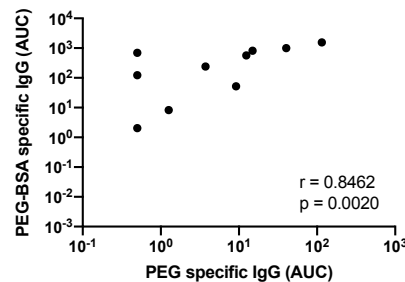

Supplementary figure 2

**A**

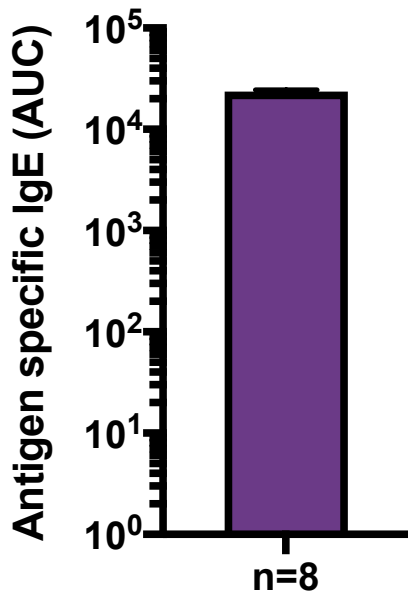

**B**

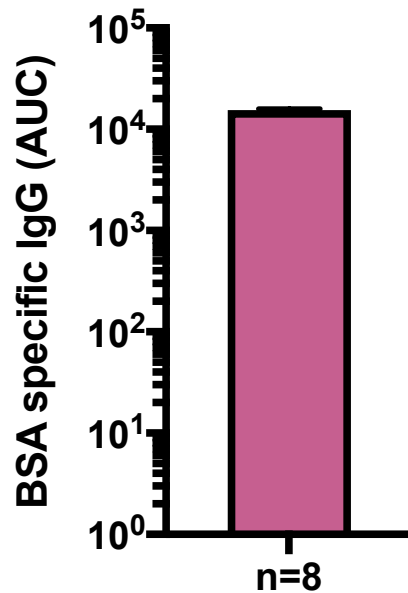

Supplement: mmc1.pdf [file mmc1.pdf]
